# Supplementary material for: Z-Ligustilide Induces c-Myc-Dependent Apoptosis via Activation of ER-Stress Signaling in Hypoxic Oral Cancer Cells
Source: Front Oncol. 2022 Apr 13;12:824043. doi: 10.3389/fonc.2022.824043 (PMC9043595; doi:10.3389/fonc.2022.824043)
Supplement: Supplementary file 2 [file Table_1.pdf]

Supplementary Table 1. Differential Type of Histones are Overexpression in High Grade

| Gene   | FDR      | Gene   | FDR      | Gene  | FDR      | Gene  | FDR      | Gene  | FDR      |
|--------|----------|--------|----------|-------|----------|-------|----------|-------|----------|
| H2AC4  | 2.46E-25 | H2BC3  | 2.89E-16 | H3C1  | 3.24E-13 | H4C1  | 5.63E-33 | CCNA2 | 1.38E-25 |
| H2AC7  | 4.70E-20 | H2BC6  | 2.04E-22 | H3C4  | 1.21E-14 | H4C9  | 3.51E-19 | ETV7  | 2.04E-12 |
| H2AC11 | 6.10E-32 | H2BC9  | 1.00E-22 | H3C7  | 4.98E-32 | H4C11 | 1.34E-23 | MMP9  | 4.34E-15 |
| H2AC12 | 1.22E-24 | H2BC10 | 6.79E-18 | H3C8  | 2.64E-10 | H4C12 | 3.72E-24 |       |          |
| H2AC13 | 4.55E-39 | H2BC11 | 3.32E-25 | H3C10 | 2.78E-37 | H4C14 | 1.20E-37 |       |          |
| H2AC14 | 3.02E-34 | H2BC12 | 1.47E-27 | H3C11 | 7.65E-23 | H4C15 | 3.72E-37 |       |          |
| H2AC16 | 1.29E-33 | H2BC13 | 3.94E-34 | H3C12 | 3.29E-26 |       |          |       |          |
| H2AC17 | 2.65E-38 | H2BC14 | 3.66E-23 | H3C13 | 3.34E-26 |       |          |       |          |
| H2AC18 | 1.23E-34 | H2BC17 | 1.51E-39 | H3C14 | 1.31E-43 |       |          |       |          |
| H2AC19 | 1.02E-39 | H2BU1  | 3.35E-19 | H3C15 | 1.31E-43 |       |          |       |          |
| H2AC21 | 2.23E-25 |        |          |       |          |       |          |       |          |
| H2AW   | 1.63E-17 |        |          |       |          |       |          |       |          |
| H2AX   | 7.89E-33 |        |          |       |          |       |          |       |          |
| H2AZ1  | 1.15E-32 |        |          |       |          |       |          |       |          |
